# Supplementary material for: Anticancer Activity of Mannose-Specific Lectin, BPL2, from Marine Green Alga Bryopsis plumosa
Source: MDPI journal article supplement (doi:10.3390/md20120776), 2022-12-13
Supplement: s1 [file s1]

Article

# Anticancer activity of mannose-specific lectin, BPL2, from marine green alga *Bryopsis plumosa*

Jei Ha Lee, Set Byul Lee, Heabin Kim, Jae Min Shin, Moongeun Yoon, Hye Suck An, and Jong Won Han\*

Department of Genetic Resources, National Marine Biodiversity Institute of Korea, Seocheon-gun 33662, Republic of Korea

\* Correspondence: [jwhan@mabik.re.kr](mailto:jwhan@mabik.re.kr); Tel.: (+82 419500913)

**Supplementary Figure S1.** Effect of BPL on the viability of A549 and H460 cell lines using MTT assays

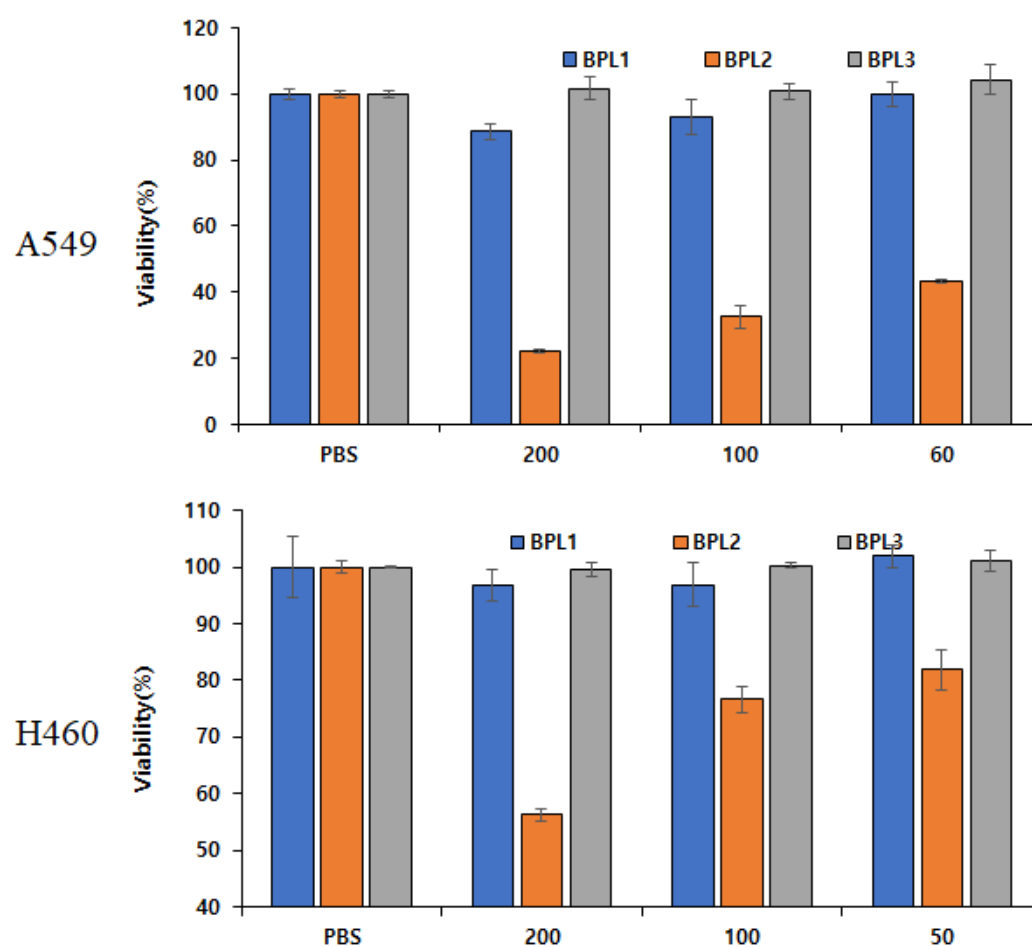

**Supplementary Table S1.** Cancer and normal cell lines used for the anticancer assay

| Cell line | Tissue       | Histology/ Derived from          | Invasivity |
|-----------|--------------|----------------------------------|------------|
| A549      | Lung         | Adenocarcinoma, primary          | ++         |
| H460      | Lung         | Large, Pleural effusion          | +          |
| H1299     | Lung         | Carcinoma, Lymph node metastasis | +++        |
| MRC-5     | Lung         | Normal fibroblast                | -          |
| 293T      | Kidney       | Embryonic kidney                 | -          |
| HaCaT     | Keratinocyte | Normal keratinocyte              | -          |

**Supplementary Table S2.** Primer sequences used for RT-PCR analysis

| Primer name | Sequence (5'-3')      |
|-------------|-----------------------|
| N-cad-fw    | ACTTGCCAGAAAACCTCCAGG |
| N-cad-rv    | TGGTGTATGGGGTTGATCCT  |
| E-cad-fw    | TGGATAGAGAACGCATTGCC  |
| E-cad-rv    | AAAATCCAAGCCCGTGCTG   |
| Zeb1-fw     | CGGCGCAATAACGTTACAAA  |
| Zeb1-rv     | AAAGGTGTAACGTCACAGGG  |
| Vimentin-fw | GAGAACTTTGCCGTTGAAGC  |
| Vimentin-rv | TCTGCTGGTATATGAGTGCTG |
| Twist-fw    | CTGGACTCCAAGATGGCAAG  |
| Twist-rv    | AGAATGCAGAGGTGTGAGGA  |
| GAPDH-fw    | GACAGTCAGCCGCATCTTCT  |
| GAPDH-rv    | GCGCCCAATACGACCAAATC  |
